# Supplementary material
Source: PubMed Central journal article supplement (PMC3911001)
Supplement: AEM.02310-13_zam999104978so1.pdf [file AEM.02310-13_zam999104978so1.pdf]

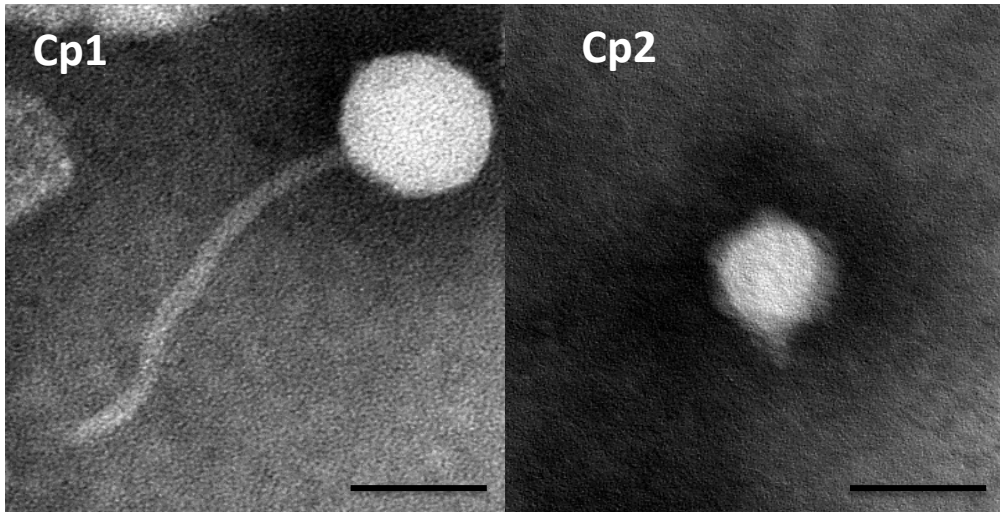

**Supplemental Fig. S1.** Morphology of Cp1 and Cp2 particles. The purified particles of Cp1 and Cp2 were negatively stained and examined by transmission electron microscopy. Cp1 particles had an icosahedral capsid of  $60 \pm 5$  nm in diameter with a long non-contractile tail of  $135 \pm 10$  nm long by  $12 \pm 2$  nm wide ( $n=20$ ). Cp2 particles showed an icosahedral capsid of  $60 \pm 5$  nm in diameter with a short tail of  $15 \pm 5$  nm long ( $n = 20$ ).

File: Cp1  
Mode: Normal 1 - 43860 5'→3'  
File: phiL7  
Mode: Normal 1 - 44080 5'→3'  
Plotting Mode: Left Up Check Size: 65 Matching Size: 33

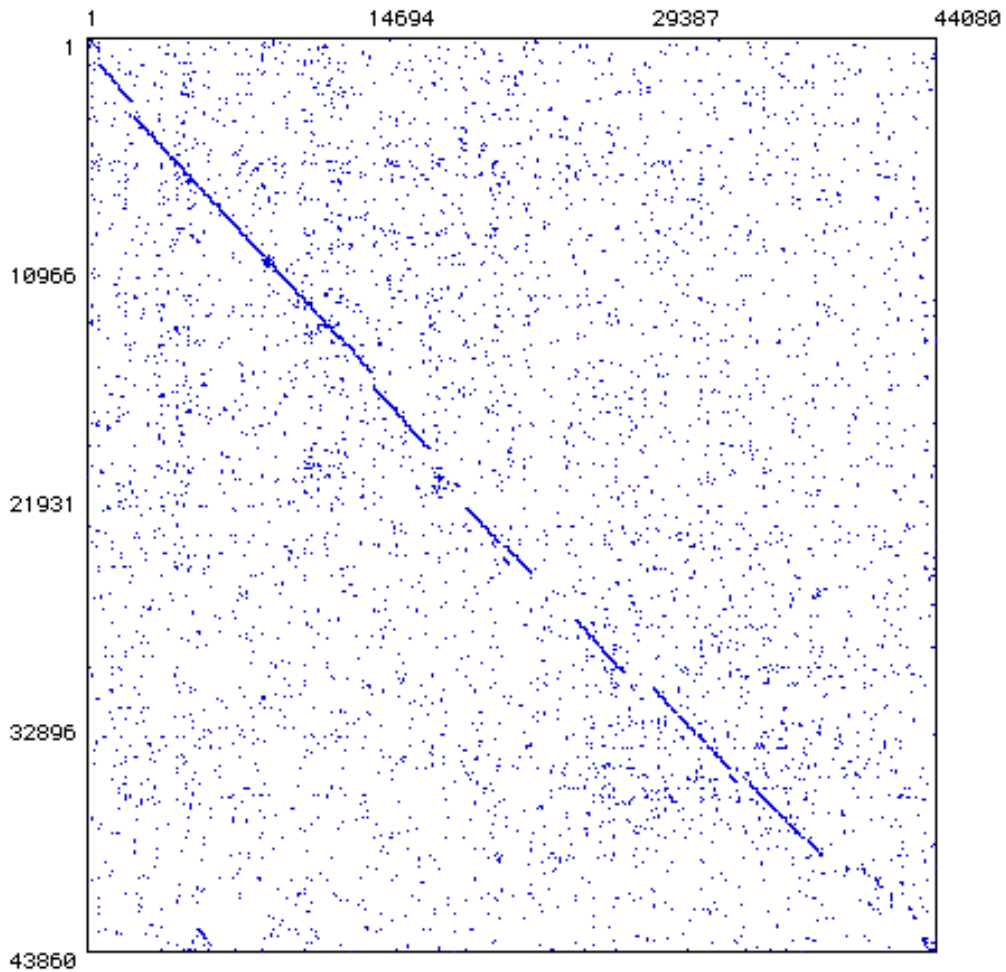

**Supplemental Fig. S2.** Matrix comparison of the nucleotide sequences between Cp1 and phiL7 genomes.

**Supplemental Table S1** Predicted ORFs found in the Cp1 genome

| Coding sequence | Strand | Position (5' to 3') | G+C (%) | Length (aa) | Mass (kDa) | Amino acid identity/similarity to best homologs                         | FASTA score (E value)    |
|-----------------|--------|---------------------|---------|-------------|------------|-------------------------------------------------------------------------|--------------------------|
| ORF1            | +      | 106-333             | 59.3    | 76          | 7.94       | p01 phiL7                                                               | 43 (0.025)               |
| ORF2            | +      | 392-628             | 52.5    | 78          | 8.44       | P02 phiL7- hypothetical protein                                         | 84 (8e-13)               |
| ORF3            | +      | 635-1315            | 53.9    | 226         | 25.06      | group 1 intron GIY-YIG endonuclease ( <i>Pseudomonas stutzeri</i> Kos6) | 123 (1e-30)              |
| ORF4            | +      | 1349-3054           | 54.6    | 568         | 61.58      | p03 phiL7-Terminase large sub unit                                      | 730 (0.0)                |
| ORF5            | +      | 3079-3723           | 50.4    | 214         | 23.71      | group 1 intron GIY-YIG endonuclease ( <i>Pseudomonas stutzeri</i> Kos6) | 109 (9e-26)              |
| ORF6            | +      | 3734-5029           | 55.1    | 431         | 46.65      | p04 phiL7-Putative head portal protein                                  | 652 (0.0)                |
| ORF7            | +      | 5026-5745           | 50.6    | 239         | 25.23      | p05 phiL7-Protease of the ClPp family                                   | 288 (5e-76)              |
| ORF 8           | +      | 5760-6944           | 59.6    | 394         | 41.7       | p06 phiL7- Head protein                                                 | 641 (0.0)                |
| ORF9            | +      | 7029-7526           | 49.1    | 165         | 18.51      | p07 phiL7- HNH endonuclease                                             | 180 (1e-43)              |
| ORF10           | +      | 7528-7863           | 53.8    | 111         | 12.6       | p08 phiL7- Phage coat protein                                           | 111 (6e-23)              |
| ORF11           | +      | 7863-8237           | 52.1    | 124         | 13.16      | p09 phiL7- Head- tail Joint                                             | 187 (8e-46)              |
| ORF12           | +      | 8227-8694           | 49.1    | 156         | 17.17      | p10 phiL7-Conserved phage protein I                                     | 172 (6e-52)              |
| ORF13           | +      | 8691-9047           | 50.1    | 118         | 13.17      | p11 phiL7- Phage coat protein                                           | 177 (7e-43)              |
| ORF14           | +      | 9057-9695           | 55.6    | 212         | 22.24      | p12 phiL7- Major tail                                                   | 288 (3e-76)              |
| ORF15           | +      | 9695-9997           | 55.0    | 100         | 10.9       | p13 phiL7- Hypothetical protein                                         | 170 (8e-41)              |
| ORF16           | +      | 10102-10311         | 57.2    | 69          | 8.05       | p14 phiL7-Conserved phage protein II                                    | 79.1(7e-25)              |
| ORF17           | +      | 10406-11917         | 50.8    | 503         | 56.34      | p15 phiL7- Hypothetical Protein                                         | 590(0.0)                 |
| ORF18           | +      | 11963-14827         | 55.4    | 953         | 99.34      | p16 phiL7-Tail length tape measure protein                              | 992 (0.0)                |
| ORF19           | +      | 14827-15189         | 48.7    | 121         | 13.81      | p17 phiL7- Tail protein I                                               | 179 (2e-43)              |
| ORF20           | +      | 15189-15647         | 52.1    | 152         | 16.79      | p18 phiL7- Tail protein II                                              | 225 (3e-57)              |
| ORF21           | +      | 15665-16051         | 54.2    | 129         | 14.62      | Xop411 phage, p21, Peptidoglycan hydrolase                              | 174 ( 7e-42)             |
| ORF22           | +      | 16064-16669         | 52.0    | 201         | 23.05      | Bacillus phage G, G3MAX5 (Gp595)                                        | 62 (9e-08)               |
| ORF23           | +      | 16710-21431         | 53.8    | 1573        | 167.72     | - OP1_ORF21,Putative tail component protein.                            | 2048(0.0)                |
| ORF24           | +      | 21478-22554         | 51.7    | 358         | 37.68      | - p20 phiL7- Tail protein III<br>OP1_ORF25,Deduced tail fiber protein   | 1496(0.0)<br>77 ( 6e-12) |
| ORF25           | +      | 22556-22855         | 49.3    | 98          | 10.48      | p22 phiL7- hypothetical protein                                         | 125 (2e-27)              |
| ORF26           | +      | 22857-23543         | 46.8    | 228         | 23.91      | p23 phiL7- Conserved Phage protein                                      | 253 (23-65)              |
| ORF27           | -      | 23540-23908         | 51.3    | 122         | 13.39      | p24 phiL7- Hypothetical protein                                         | 200 (1e-63)              |
| ORF27.1         | +      | 24387-24587         | 50.9    | 66          | 7.046      | P27 phiL7- putative holin                                               | 48 (7e-5)                |
| ORF28           | +      | 24591-25130         | 53.9    | 179         | 19.83      | p28 phiL7- Phage type lysozyme                                          | 265 (2e-69)              |
| ORF29           | +      | 25099-25467         | 51.0    | 122         | 13.5       | p29 phiL7- Hypothetical protein                                         | 110 (7e-23)              |
| ORF30           | -      | 25676-26327         | 53.2    | 200         | 22.27      | group I intron endonuclease (D6TZN2)                                    | 71 ( 1e-10)              |

Supplemental Table S1 continued

| Coding sequence | Strand | Position (5' to 3') | G+C (%) | Length (aa) | Mass (kDa) | Amino acid identity/similarity to best homologs                                 | BLAST score (E value) |
|-----------------|--------|---------------------|---------|-------------|------------|---------------------------------------------------------------------------------|-----------------------|
| ORF31           | -      | 26558-27104         | 50.8    | 181         | 19.39      | <i>Hemophilus parasuis</i> SH0165 (Interrupted gp229, phage associated )        | 160 (8e-45)           |
| ORF32           | -      | 27100-27534         | 53.7    | 144         | 14.35      | F7T9I5(Putative uncharacterized protein)                                        | 69 (3e-10)            |
| ORF33           | -      | 27912-30327         | 53.6    | 804         | 91.43      | p35 phiL7- RNA polymerase                                                       | 1212 (0.0)            |
| ORF34           | -      | 30601-31164         | 54.3    | 187         | 21.14      | <i>Pantoea</i> phage LIMEzero (F4N9T4), Putative uncharacterized protein        | 86 (3e-15)            |
| ORF35           | -      | 31175-32026         | 50.4    | 283         | 32.35      | p39 phiL7- Putative DNA polymerase III                                          | 456 (e-126)           |
| ORF36           | -      | 32013-32408         | 53.5    | 131         | 14.64      | p40 phiL7- Endonuclease VII                                                     | 134 (4e-30)           |
| ORF37           | -      | 32405-33334         | 56.0    | 309         | 34.35      | p41 phiL7- Exonuclease                                                          | 312 (5e-83)           |
| ORF38           | -      | 33334-34215         | 57.1    | 293         | 32.02      | ADQ2- <i>Caulobacter</i> Cd1 Phage, Putative Uncharacterized protein            | 133 (4e-11)           |
| ORF39           | -      | 34229-34936         | 55.3    | 235         | 26.6       | unknown                                                                         |                       |
| ORF40           | -      | 35296-37014         | 53.2    | 572         | 63.96      | p46 phiL7- DNA polymerase lacking N-terminal exonuclease                        | 550(e-154)            |
| ORF41           | -      | 37073-38365         | 55.5    | 430         | 48.35      | p47 phiL7- Replicative helicase of the DnaB family                              | 408 (e-113)           |
| ORF42           | -      | 38350-39177         | 52.0    | 275         | 30.6       | p48 phiL7-DNA primase of the DnaG family                                        | 239 (4e-61)           |
| ORF43           | -      | 39758-40066         | 43.8    | 102         | 12.21      | Xop411_p 45 Hypothetical protein                                                | 74 (1e-11)            |
| ORF44           | -      | 40063-40263         | 42.1    | 66          | 7.46       | Xp10_45L, 7K protein; inhibitor of transcription initiation and anti-terminator | 35.8(0.13)            |
| ORF45           | +      | 41309-41626         | 53.2    |             | 11.55      | unknown                                                                         | -----                 |
| ORF46           | +      | 42546-43075         | 46.9    | 175         | 20.24      | p07 phiL7- HNH endonuclease                                                     | 166 (4e-50)           |
| ORF47           | +      | 43111-43425         | 45.6    | 104         | 12.38      | p57 phiL7                                                                       | 57 (1e-06)            |

**Supplemental Table S2** Predicted ORFs found in the Cp2 genome

| Coding sequence | Strand | Position (5' to 3') | G+C (%) | Length (aa) | Mass (kDa) | Amino acid identity/similarity to best homologs                                                                                                               | FASTA score (E value)     |
|-----------------|--------|---------------------|---------|-------------|------------|---------------------------------------------------------------------------------------------------------------------------------------------------------------|---------------------------|
| ORF1            | +      | 454-1398            | 66.8    | 314         | 34.88      | phage protein Gp37/Gp68.                                                                                                                                      | 329(3e-108)               |
| ORF2            | +      | 1364-1945           | 63.2    | 193         | 18.1       | hypothetical protein F116p34<br>( <i>Pseudomonas</i> phage F116)                                                                                              | 106 (6e-26)               |
| ORF3            | +      | 2262-2717           | 66.8    | 151         | 16         | holliday junction resolvase , RUSA                                                                                                                            | 112 (2e-28)               |
| ORF4            | +      | 2836-3952           | 73.9    | 372         | 32.71      | no similarity                                                                                                                                                 | ----                      |
| ORF5            | +      | 4030-4632           | 70.5    | 200         | 21.46      | phage lysozyme ( <i>Burkholderia multivorans</i> CF2)                                                                                                         | 127(1e-32)                |
| ORF6            | +      | 4635-5108           | 64      | 157         | 16.46      | hypothetical protein SSKA14_3083<br>( <i>Stenotrophomonas</i> sp. SKA14)                                                                                      | 51 (3e-06)                |
| ORF7            | +      | 5105-5662           | 67.3    | 185         | 20.37      | hypothetical protein SSKA14_2891<br>( <i>Stenotrophomonas</i> sp. SKA14)                                                                                      | 80 (1e-12)                |
| ORF8            | +      | 5665-5979           | 67.6    | 104         | 11.61      | hypothetical protein XVE_1166<br>( <i>Xanthomonas vesicatoria</i> ATCC 35937)                                                                                 | 59(1e-09)                 |
| ORF9            | +      | 6031- 6360          | 67.3    | 109         | 11.45      | No similarity                                                                                                                                                 | ----                      |
| ORF10           | +      | 6712-7149           | 65.8    | 145         | 16.1       | hypothetical protein Pden_3755<br>( <i>Paracoccus denitrificans</i> PD1222)                                                                                   | 59 (4e-09)                |
| ORF11           | +      | 7289-8815           | 67      | 508         | 56.21      | putative phage terminase B protein<br>[ <i>Enterococcus</i> phage phiEf11]                                                                                    | 196 (7e-53)               |
| ORF12           | +      | 8820-9158           | 65.3    | 112         | 11.95      | Bbp20 ( <i>Bordetella</i> phage BPP-1)                                                                                                                        | 58(4e-09)                 |
| ORF13           | +      | 9234 -11294         | 67.6    | 686         | 74.87      | bacteriophage head to tail connecting protein                                                                                                                 | 300 (2e-89)               |
| ORF14           | +      | 11629-12354         | 65.8    | 241         | 25.11      | endoprotease ( <i>Pantoea</i> sp. aB)                                                                                                                         | 84 ( 1e-16)               |
| ORF15           | +      | 12398-13411         | 63.1    | 337         | 36.38      | putative major capsid protein<br>( <i>Pseudomonas</i> phage AF)                                                                                               | 257 (8e-80)               |
| ORF16           | +      | 13447-13893         | 66.6    | 148         | 15.35      | hypothetical protein AF_009<br>( <i>Pseudomonas</i> phage AF)                                                                                                 | 73 7e-14)                 |
| ORF17           | +      | 13947-14537         | 59.5    | 196         | 19.98      | no similarity                                                                                                                                                 | ---                       |
| ORF18           | +      | 14607-15290         | 67.3    | 227         | 24.71      | putative tail tubular protein A<br>( <i>Pseudomonas</i> phage AF)                                                                                             | 89(1e-18)                 |
| ORF19           | +      | 15292-16683         | 65.7    | 463         | 49.5       | putative phage protein p13<br>( <i>Hydrogenophaga</i> sp. PBC)                                                                                                | 155 (9e-38)               |
| ORF20           | +      | 16683-18395         | 65.1    | 570         | 61.81      | <i>Salmonella</i> phage epsilon15                                                                                                                             | 350(5e-07)                |
| ORF21           | +      | 18392-18868         | 64.5    | 158         | 17.7       | hypothetical protein PhiV10p16<br>( <i>Escherichia</i> phage phiV10)                                                                                          | 112 (3e-28)               |
| ORF22           | +      | 18868-19371         | 67.5    | 167         | 17.11      | hypothetical protein Q5W_4240<br>( <i>Hydrogenophaga</i> sp. PBC)                                                                                             | 64 (2e-12)                |
| ORF23           | +      | 19371-21563         | 68.8    | 730         | 79.04      | putative structural lysozyme<br>( <i>Pseudomonas</i> phage AF)                                                                                                | 94(4e-17)                 |
| ORF24           | +      | 21566-29002         | 68.2    | 2478        | 267.54     | hypothetical protein AF_016<br>( <i>Pseudomonas</i> phage AF)                                                                                                 | 506(9e-143)               |
| ORF25           | +      | 29002-30111         | 63.5    | 369         | 40.13      | endo-N- acetylneuraminidase<br>(Endosialidase) family protein,                                                                                                | 79 (4e-13)                |
| ORF26           | +      | 30289-31314         | 64.2    | 341         | 35.78      | end_tail_spike<br>LysM domain protein ( <i>Xanthomonas citri</i><br><i>pv. mangiferaeindicae</i> )                                                            | 115(1e-24)                |
| ORF27           | +      | 31311-32243         | 60.9    | 310         | 33         | putative tail fiber protein ( <i>Pseudomonas</i><br>phage PT2)                                                                                                | 64(9e- 09)                |
| ORF28           | +      | 32233-32808         | 61.0    | 191         | 21.69      | tail fibre protein ( <i>Pseudomonas</i> phage<br>LUZ19)                                                                                                       | 74 (2e-13)                |
| ORF29           | -      | 33018-33584         | 67.6    | 188         | 21.26      | hypothetical protein YPK_2318 ( <i>Yersinia</i><br><i>pseudotuberculosis</i> YPIII)                                                                           | 70 (6e-12)                |
| ORF30           | -      | 33829-34191         | 63.8    | 120         | 12.84      | N4 Gp49/Sf6 protein 66 phage family<br>protein ( <i>Acinetobacter baumannii</i><br>OFCO211)                                                                   | 110 (6e-29)               |
| ORF31           | -      | 34225-34710         | 64.9    | 161         | 17.68      | Orf76( <i>Pseudomonas</i> phage D3)                                                                                                                           | 73 (2e-13)                |
| ORF32           | -      | 34723-35160         | 62.7    | 145         | 16.35      | Single-stranded DNA binding protein<br>( <i>Xanthomonas translucens</i> <i>pv. graminis</i><br>ART-Xtg29)                                                     | 173 (5e-52)               |
| ORF33           | -      | 35157-35534         | 65.3    | 125         | 13.27      | - hypothetical protein Bphy_1919<br>( <i>Burkholderia phymatum</i> STM815)<br>- bacteriophage-like protein ( <i>Ralstonia</i><br><i>solanacearum</i> GMI1000] | 106 (2e-26)<br>103(2e-25) |

Supplemental Table S2 continued

| Coding sequence | Strand | Position (5' to 3') | G+C (%) | Length (aa) | Mass (kDa) | Amino acid identity/similarity to best homologs                                                     | BLAST score (E value) |
|-----------------|--------|---------------------|---------|-------------|------------|-----------------------------------------------------------------------------------------------------|-----------------------|
| ORF30           | -      | 33829-34191         | 63.8    | 120         | 12.84      | N4 Gp49/Sf6 protein 66 phage family protein ( <i>Acinetobacter baumannii</i> OFCO211)               | 110 (6e-29)           |
| ORF31           | -      | 34225-34710         | 64.9    | 161         | 17.68      | Orf76(Pseudomonas phage D3)                                                                         | 73 (2e-13)            |
| ORF32           | -      | 34723-35160         | 62.7    | 145         | 16.35      | Single-stranded DNA binding protein ( <i>Xanthomonas translucens</i> pv. <i>graminis</i> ART-Xtg29) | 173 (5e-52)           |
| ORF33           | -      | 35157-35534         | 65.3    | 125         | 13.27      | - hypothetical protein Bphy_1919 ( <i>Burkholderia phymatum</i> STM815)                             | 106 (2e-26)           |
| ORF34           | -      | 35534-36157         | 65.5    | 207         | 23.36      | - bacteriophage-like protein ( <i>Ralstonia solanacearum</i> GMI1000)                               | 103(2e-25)            |
| ORF35           | -      | 36385-37227         | 64.4    | 280         | 30.33      | YqaJ-like viral recombinase domain; pfam09588 ( <i>Xanthobacter autotrophicus</i> Py2)              | 207(7e-64)            |
| ORF36           | -      | 37496-39031         | 69.3    | 511         | 56.94      | ERF family protein ( <i>Burkholderia glumae</i> BGR1)                                               | 179 (7e-51)           |
| ORF37           | -      | 39072-39896         | 65.9    | 274         | 29.27      | hypothetical protein F116p18 ( <i>Pseudomonas</i> phage F116)                                       | 73(4e-11)             |
| ORF38           | -      | 39951-40325         | 63.4    | 124         | 13.04      | protein of unknown function (DUF2303)(Vibrio phage VvAW1)                                           | 190 (2e-55)           |
| ORF39           | +      | 41829-42176         | 66.7    | 115         | 12.48      | hypothetical protein VvAW1_00024c (Vibrio phage VvAW1)                                              | 76 (3e-15)            |
| ORF40           | +      | 42178-231           | 62.6    | 338         | 36.7       | Predicted: DNA polymerase subunit gamma-1 ( <i>Callithrix jacchus</i> )                             | 35 (2.2)              |
|                 |        |                     |         |             |            | - hypothetical protein ( <i>Escherichia</i> phage TL-2011b) "PhdYeFM_antitox"                       | 140(1e-35)            |
|                 |        |                     |         |             |            | - Pyocin large subunit-like protein [ <i>Pseudomonas</i> sp. R81]                                   | 127(3e-31)            |
